# Supplementary material
Source: MDPI journal article supplement (https://www.mdpi.com/2073-4441/14/24/4115)
Supplement: s1 [file s1]

Supplementary Materials

# Impacts of Precipitation Type Variations on Runoff Changes in the Source Regions of the Yangtze and Yellow River Basins in the Past 40 Years

Yingying Hu <sup>1</sup>, Yuyan Zhou <sup>1,\*</sup>, Yicheng Wang <sup>1,\*</sup>, Fan Lu <sup>1</sup>, Weihua Xiao <sup>1</sup>, Baodeng Hou <sup>1</sup>, Yuanhui Yu <sup>1,2</sup>, Jianwei Liu <sup>1,3</sup> and Wei Xue <sup>1</sup>

**Table S1.** Information for meteorological stations.

| Station Code | Name       | Latitude(°N) | Longitude(°E) | Elevation(m) |
|--------------|------------|--------------|---------------|--------------|
| 1            | Nuomuhong  | 36.43        | 96.43         | 2790.40      |
| 2            | Dulan      | 36.30        | 98.10         | 3191.10      |
| 3            | Gonghe     | 36.27        | 100.62        | 2835.00      |
| 4            | Guide      | 36.03        | 101.43        | 2237.10      |
| 5            | Xinghai    | 35.58        | 99.98         | 3323.20      |
| 6            | Guinan     | 35.58        | 100.73        | 3120.00      |
| 7            | Tongren    | 35.52        | 102.02        | 2491.40      |
| 8            | Qumalai    | 34.12        | 95.80         | 4175.00      |
| 9            | Maduo      | 34.92        | 98.22         | 4272.30      |
| 10           | Qingshuihe | 33.80        | 97.13         | 4415.40      |
| 11           | Shiqu      | 32.98        | 98.10         | 4200.00      |
| 12           | Maqin      | 34.48        | 100.23        | 3719.00      |
| 13           | Dari       | 33.75        | 99.65         | 3967.50      |
| 14           | Henan      | 34.73        | 101.60        | 3500.00      |
| 15           | Jiuzhi     | 33.43        | 101.48        | 3628.50      |
| 16           | Maqu       | 34.00        | 102.08        | 3471.40      |
| 17           | Ruoergai   | 33.58        | 102.97        | 3439.60      |
| 18           | Banma      | 32.93        | 100.75        | 3530.00      |
| 19           | Maerkang   | 31.90        | 102.23        | 2664.40      |
| 20           | Hongyuan   | 32.80        | 102.55        | 3491.60      |
| 21           | Songpan    | 32.67        | 103.60        | 2850.70      |
| 22           | Xiaozaohuo | 36.80        | 93.68         | 2767.00      |
| 23           | Geermu     | 36.42        | 94.92         | 2807.60      |
| 24           | Wudaoliang | 35.22        | 93.08         | 4612.20      |
| 25           | Anduo      | 32.35        | 91.10         | 4800.00      |
| 26           | Tuotuohe   | 34.22        | 92.43         | 4533.10      |
| 27           | Zaduo      | 32.88        | 95.28         | 4066.40      |
| 28           | Yushu      | 33.00        | 96.97         | 3681.20      |
| 29           | Suoxian    | 31.88        | 93.78         | 4022.80      |

**Table S2.** Information for hydrological stations.

| Name       | Latitude(°N) | Longitude(°E) | Elevation(m) |
|------------|--------------|---------------|--------------|
| Zhimenda   | 33.033       | 97.22         | 3540         |
| Tangnaihai | 35.5         | 100.15        | 3623         |
